# Supplementary material for: Self-efficacy and Associated Factors Among Diabetic Patients in South-western Nigeria
Source: Research Square preprint supplement (doi:10.21203/rs.3.rs-8263478/v1), 2026-01-12
Supplement: Supplementary file 1 [file eafa8d5d4b8cf9e550e420a8.docx]

**APPENDIX 1: Questionnaire for Assessment of Perceived Diabetic-related Complications** **(QAPDC)**

NOTE: Please tick the appropriate boxes provided.

# **SECTION A: SOCIO-DEMOGRAPHIC CHARACTERISTICS**

1. Age at your last birthday:
2. Sex: (a) Male ( ) (b) Female ( )
3. Marital status: (a) Single ( ) (b) Married ( ) (c) Divorced ( ) (d) Widow/Widower ( )
4. Religion: (a) Christian ( ) (b) Islam ( ) (c) Traditional ( ) (d) Others ( )
5. Residence: (a) Oyo State ( ) (b) Lagos State ( )
6. Employment status: (a) Employed ( ) (b) Self-Employed ( ) (c) Unemployed ( )
7. Educational level: (a) Primary ( ) (b) Secondary ( ) (c) Tertiary ( ) (d) Postgraduate

( )

1. Duration of diabetes: (a) 1-3 years ( ) (b) 4 -6 years ( ) (c) 7-10years (d) 10 years and above ( )
2. Do you own a glucometer (blood glucose machine): (a) yes ( ) (b) no ( )

# **SECTION B: LEVEL OF DIABETIC-RELATED COMPLICATIONS**

36. Have you ever been diagnosed with any diabetes-related complication (a) yes ( ) (b) no ( ) If yes tick in the appropriate box

| S/N | QUESTIONS | YES | NO |
| --- | --- | --- | --- |
| 37 | Have you experienced vision problems or any changes in the eyesight? |  |  |
| 38 | Have you ever had wounds or sores that took longer time to heal? |  |  |
| 39 | Have you ever been diagnosed with kidney problems? |  |  |
| 40 | Have you ever had amputation on any part of your body or limbs? |  |  |
| 41 | Have you ever experienced numbness, tingling or reduced sensation in any part of your body fingers or toes? |  |  |
| 42 | Have you ever been diagnosed with hypertension? |  |  |
| 43 | Have you ever had urinary tract infection or issues when urinating? |  |  |

44. Have you ever been hospitalized due to any diabetic-related complication (a) yes, within the past year ( ) (b) yes, within the past five years ( ) (c) yes, more than five years ( ) (d) yes, more than five years ( ) (e) no I have never been hospitalized due to diabetic complication ( ).
